# Supplementary material
Source: Elsevier journal article supplement (https://www.sciencedirect.com/science/article/pii/S2173572722000960)

### a. The length of hospital stay

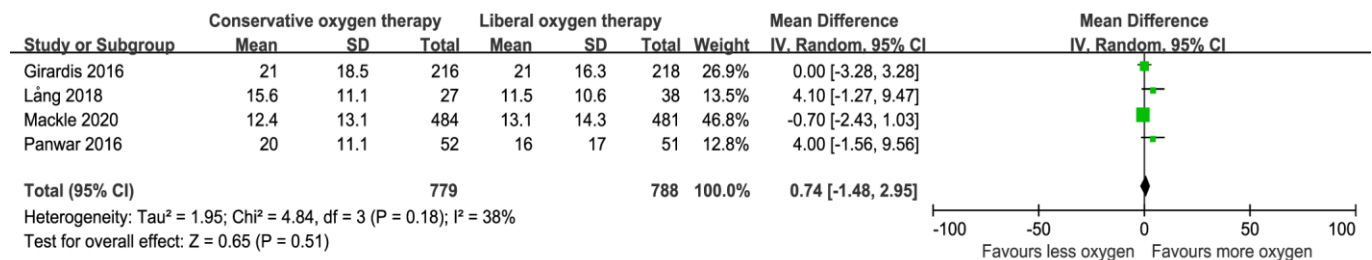

### b. The length of ICU stay

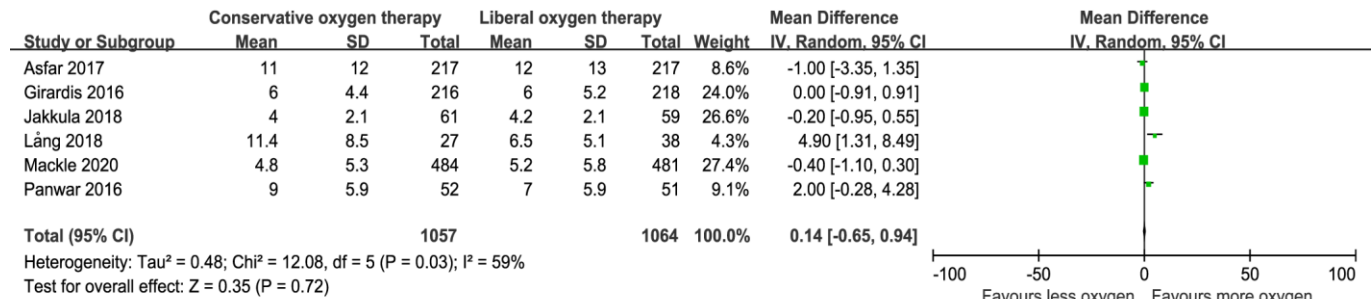

### c. Mechanical ventilation-free days up to day 28

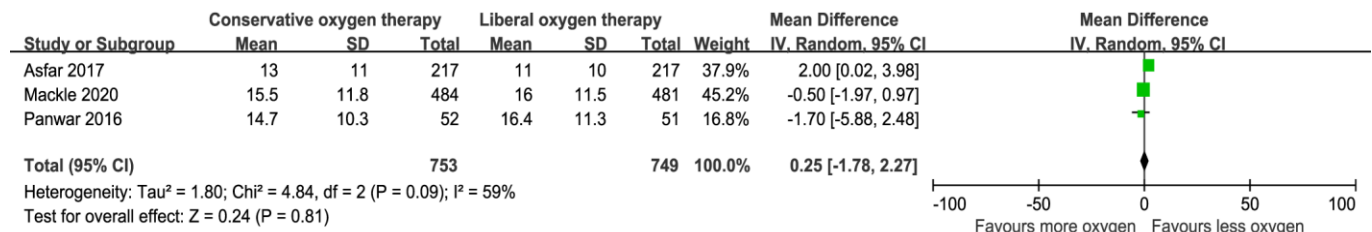

### d. New-onset pneumonia

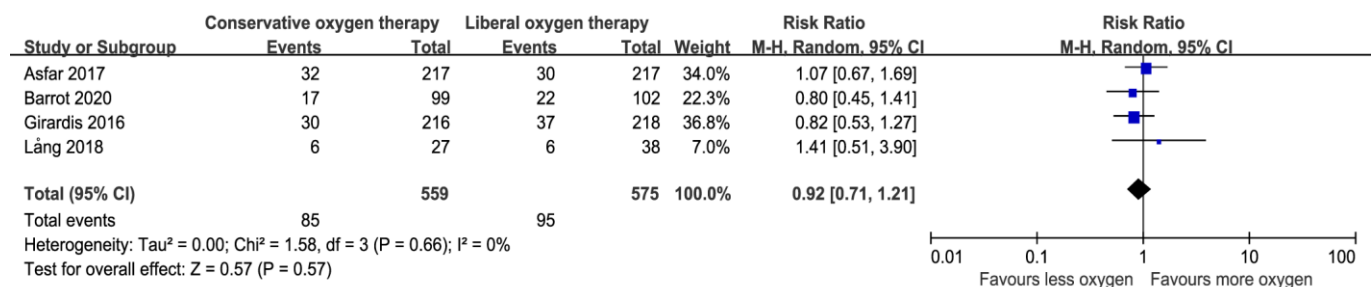

### e. New-onset infection

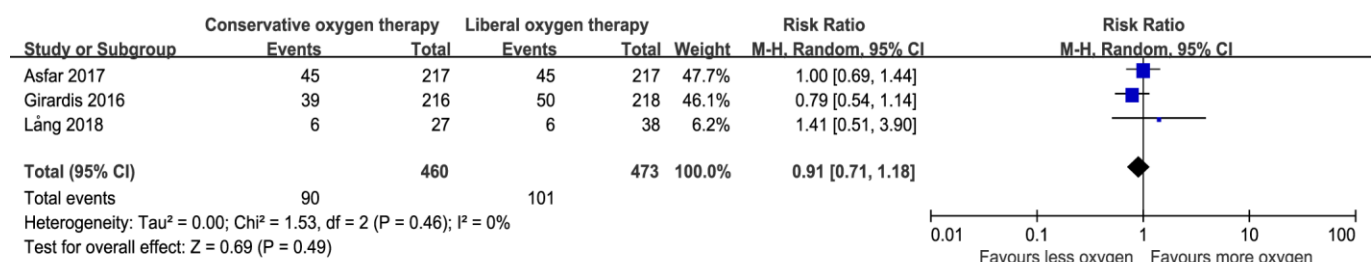

f. New-onset ARDS

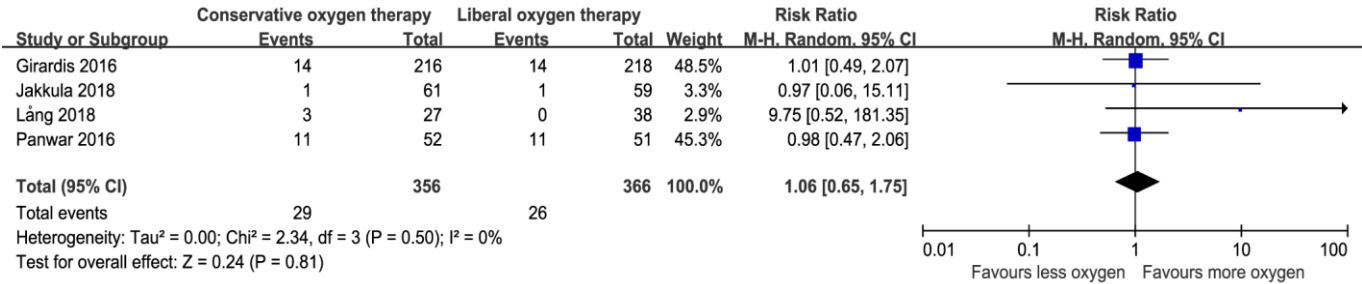

g. Atelectasis

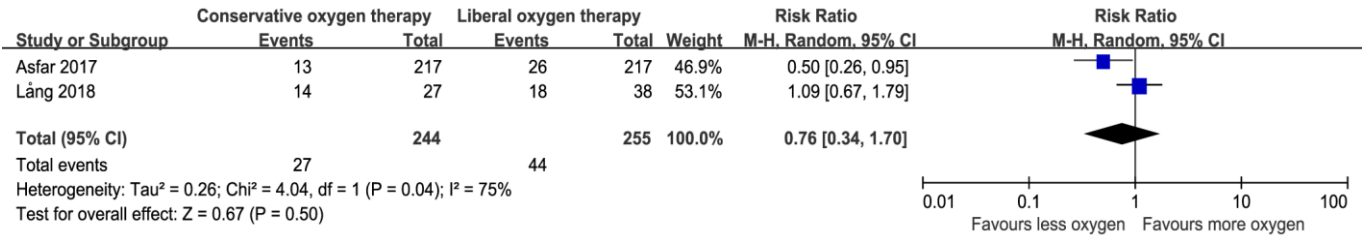

h. Pneumothorax

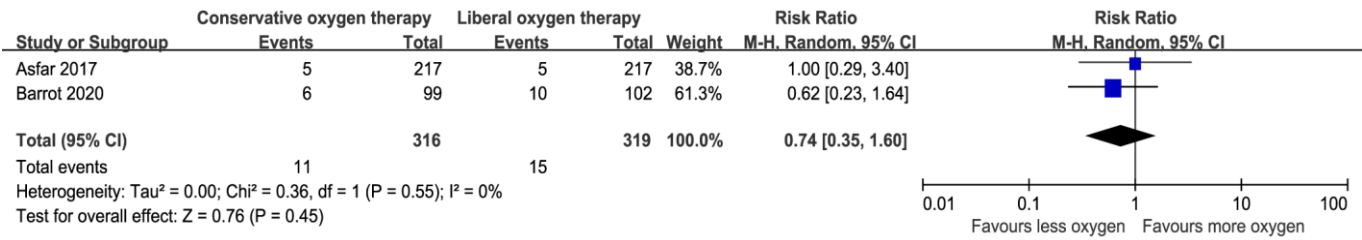

i. Mesenteric ischaemia

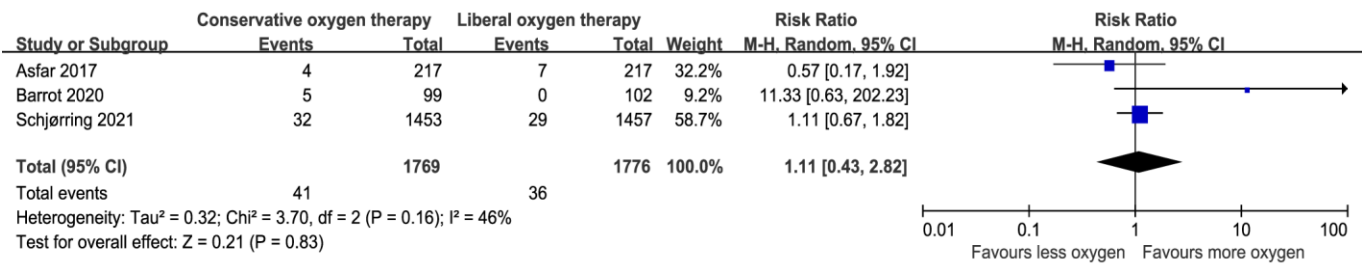

Supplement: mmc5 [file S2173572722000960:mmc5.pdf]
